# Supplementary material for: Development of a site fidelity index based on population capture-recapture data
Source: PeerJ. 2018 May 9;6:e4782. doi: 10.7717/peerj.4782 (PMC5949061; doi:10.7717/peerj.4782)
Supplement: Supplemental Information 1 [file peerj-06-4782-s001.docx]

# Supplemental Information- Data S1

*Example of application of the indicators IO, IT, It*

As a better understanding of the methods, an example of applications of the indicators is given. Given an individual capture-recapture history *i,* with five sampling occasions (*T*) and a non-constant sampling period of eight days (*F*):

Then *IO, IT* and *It* are calculated as
